# Supplementary material for: The diet of polar bears (Ursus maritimus) from Svalbard, Norway, inferred from scat analysis
Source: Springer Nature journal article supplement (doi:10.1007/s00300-012-1284-2), 2013-01-12
Supplement: 300_2012_1284_MOESM1_ESM.pdf [file 300_2012_1284_MOESM1_ESM.pdf]

| no  | Area           | date       | Season | sex, age      | Pusa hispida | Pusa hispida, pup | Pusa hispida, adult | Erignathus barbatus | Unknown seal | Seal | R.tarandus | Unknown.bone | Bird | Egg | Algae | Plants | Grass | Segde | Moss | Lichen | Dicotyledon | Monocotyledon | Unknown plant | Gravel | Polar.bear.hair |
|-----|----------------|------------|--------|---------------|--------------|-------------------|---------------------|---------------------|--------------|------|------------|--------------|------|-----|-------|--------|-------|-------|------|--------|-------------|---------------|---------------|--------|-----------------|
| 74  | NA             | 27/04/2003 | Spring |               | 0            | 0                 | 0                   | 0                   | 1            | 1    | 0          | 0            | 0    | 0   | 0     | 0      | 0     | 0     | 0    | 0      | 0           | 0             | 0             | 0      | 0               |
| 75  | Kvalvågen      | 19/04/2003 | Spring | cub, 0yr      | 1            | 1                 | 0                   | 0                   | 0            | 1    | 0          | 0            | 1    | 0   | 0     | 1      | 1     | 1     | 1    | 0      | 1           | 0             | 0             | 1      | 0               |
| 76  | Hornsund       | 10/04/2003 | Spring | Fem           | 1            | 1                 | 0                   | 0                   | 0            | 1    | 0          | 0            | 0    | 0   | 0     | 0      | 0     | 0     | 0    | 0      | 0           | 0             | 0             | 0      | 0               |
| 77  | Emiljanovbreen | 22/04/2003 | Spring | Fem           | 1            | 0                 | 1                   | 0                   | 0            | 1    | 0          | 0            | 0    | 0   | 0     | 0      | 0     | 0     | 0    | 0      | 0           | 0             | 0             | 0      | 0               |
| 78  | Tjuvfjorden    | 18/04/2003 | Spring | Male, 12 yrs. | 1            | 1                 | 0                   | 0                   | 1            | 1    | 0          | 0            | 0    | 0   | 0     | 0      | 0     | 0     | 0    | 0      | 0           | 0             | 0             | 0      | 0               |
| 79  | Tjuvfjorden    | 17/04/2003 | Spring |               | 1            | 1                 | 0                   | 0                   | 1            | 1    | 0          | 0            | 0    | 0   | 0     | 0      | 0     | 0     | 0    | 0      | 0           | 0             | 0             | 0      | 0               |
| 80  | Tjuvfjorden    | 16/04/2003 | Spring |               | 0            | 0                 | 0                   | 0                   | 0            | 0    | 0          | 0            | 1    | 0   | 1     | 0      | 0     | 0     | 0    | 0      | 0           | 0             | 0             | 0      | 0               |
| 81  | Tjuvfjorden    | 16/04/2003 | Spring | Male          | 1            | 0                 | 0                   | 0                   | 0            | 1    | 0          | 0            | 1    | 0   | 1     | 0      | 0     | 0     | 0    | 0      | 0           | 0             | 0             | 0      | 0               |
| 82  | Kvalvågen      | 19/04/2003 | Spring |               | 1            | 1                 | 0                   | 0                   | 0            | 1    | 0          | 0            | 0    | 0   | 1     | 1      | 0     | 0     | 0    | 0      | 0           | 0             | 1             | 1      | 0               |
| 83  | Tjuvfjorden    | 18/04/2003 | Spring |               | 1            | 1                 | 0                   | 0                   | 1            | 1    | 0          | 0            | 0    | 0   | 0     | 0      | 0     | 0     | 0    | 0      | 0           | 0             | 0             | 0      | 1               |
| 84  | Wichebukta     | 21/04/2003 | Spring | Fem, 1 yr.    | 0            | 0                 | 0                   | 0                   | 1            | 1    | 0          | 0            | 0    | 0   | 0     | 0      | 0     | 0     | 0    | 0      | 0           | 0             | 0             | 0      | 1               |
| 85  | Hornsund       | 10/04/2003 | Spring |               | 1            | 0                 | 1                   | 0                   | 0            | 1    | 0          | 0            | 0    | 0   | 0     | 0      | 0     | 0     | 0    | 0      | 0           | 0             | 0             | 0      | 0               |
| 86  | Kvalvågen      | 19/04/2003 | Spring |               | 1            | 1                 | 0                   | 0                   | 1            | 1    | 0          | 0            | 0    | 0   | 0     | 0      | 0     | 0     | 0    | 0      | 0           | 0             | 0             | 0      | 0               |
| 87  | Tjuvfjorden    | 17/09/2003 | Summer |               | 0            | 0                 | 0                   | 0                   | 1            | 1    | 0          | 0            | 0    | 0   | 1     | 0      | 0     | 0     | 0    | 0      | 0           | 0             | 0             | 0      | 0               |
| 88  | Hornsund       | 09/04/2003 | Spring | Male, ad      | 0            | 0                 | 0                   | 0                   | 1            | 1    | 0          | 0            | 0    | 0   | 0     | 0      | 0     | 0     | 0    | 0      | 0           | 0             | 0             | 0      | 0               |
| 89  | Tjuvfjorden    | 17/04/2003 | Spring |               | 1            | 1                 | 0                   | 0                   | 0            | 1    | 0          | 0            | 0    | 0   | 1     | 0      | 0     | 0     | 0    | 0      | 0           | 0             | 0             | 0      | 0               |
| 90  | Tjuvfjorden    | 15/04/2003 | Spring |               | 1            | 1                 | 0                   | 0                   | 0            | 1    | 0          | 0            | 0    | 0   | 1     | 0      | 0     | 0     | 0    | 0      | 0           | 0             | 0             | 0      | 0               |
| 91  | NA             | 15/04/2003 | Spring |               | 1            | 1                 | 0                   | 0                   | 1            | 1    | 0          | 0            | 0    | 0   | 0     | 1      | 0     | 0     | 0    | 0      | 1           | 0             | 0             | 0      | 1               |
| 92  | Franzøya       | 29/07/2003 | Summer |               | 0            | 0                 | 0                   | 0                   | 0            | 0    | 0          | 1            | 0    | 0   | 0     | 1      | 1     | 0     | 1    | 0      | 0           | 0             | 0             | 0      | 0               |
| 93  | Edgeøya        | 24/04/2008 | Spring | Fem, subad    | 1            | 0                 | 1                   | 0                   | 0            | 1    | 0          | 0            | 0    | 0   | 0     | 1      | 1     | 0     | 1    | 0      | 0           | 0             | 0             | 1      | 0               |
| 94  | NA             | NA         | NA     |               | 1            | 1                 | 0                   | 0                   | 0            | 1    | 0          | 0            | 0    | 0   | 0     | 0      | 0     | 0     | 0    | 0      | 0           | 0             | 0             | 0      | 0               |
| 95  | Engeløya       | 25/07/2003 | Summer |               | 0            | 0                 | 0                   | 0                   | 0            | 0    | 0          | 0            | 1    | 1   | 0     | 1      | 0     | 0     | 1    | 0      | 1           | 0             | 1             | 0      | 1               |
| 96  | NA             | 2010       | Summer |               | 0            | 0                 | 0                   | 0                   | 0            | 0    | 1          | 0            | 1    | 1   | 0     | 1      | 1     | 0     | 1    | 1      | 1           | 0             | 0             | 0      | 0               |
| 97  | NA             | 2010       | Summer |               | 0            | 0                 | 0                   | 0                   | 0            | 0    | 1          | 0            | 1    | 0   | 1     | 1      | 0     | 0     | 1    | 1      | 1           | 0             | 1             | 0      | 0               |
| 98  | Genevrabukta   | 13/04/2010 | Spring | Fem, ad       | 1            | 1                 | 0                   | 0                   | 0            | 1    | 0          | 0            | 0    | 0   | 0     | 1      | 1     | 1     | 1    | 0      | 1           | 0             | 1             | 1      | 0               |
| 99  | Heimland       | 14/04/2010 | Spring |               | 0            | 0                 | 0                   | 0                   | 0            | 0    | 0          | 0            | 0    | 0   | 0     | 1      | 1     | 0     | 1    | 0      | 1           | 0             | 0             | 0      | 0               |
| 100 | Heimland       | 14/04/2010 | Spring | Male          | 1            | 1                 | 0                   | 0                   | 0            | 1    | 0          | 0            | 0    | 0   | 0     | 0      | 0     | 0     | 0    | 0      | 0           | 0             | 0             | 0      | 0               |
| 101 | Dunerbukta     | 13/04/2010 | Spring |               | 1            | 1                 | 0                   | 0                   | 0            | 1    | 0          | 0            | 0    | 0   | 0     | 0      | 0     | 0     | 0    | 0      | 0           | 0             | 0             | 0      | 0               |
| 102 | Yoldiabukta    | 17/04/2010 | Spring | cub, 0yr      | 1            | 1                 | 0                   | 0                   | 0            | 1    | 1          | 0            | 0    | 0   | 0     | 1      | 1     | 0     | 1    | 0      | 0           | 0             | 1             | 1      | 1               |
| 103 | Kvalrossøya    | 24/03/2010 | Spring | Male, ad      | 0            | 0                 | 0                   | 0                   | 1            | 1    | 0          | 0            | 0    | 0   | 0     | 0      | 0     | 0     | 0    | 0      | 0           | 0             | 0             | 0      | 0               |
| 104 | Heimland       | 08/04/2010 | Spring |               | 0            | 0                 | 0                   | 0                   | 0            | 0    | 1          | 0            | 0    | 0   | 0     | 1      | 0     | 1     | 1    | 0      | 1           | 0             | 1             | 0      | 0               |
| 105 | NA             | 16/04/2009 | Spring |               | 0            | 0                 | 0                   | 0                   | 0            | 0    | 1          | 0            | 0    | 0   | 0     | 0      | 0     | 0     | 0    | 0      | 0           | 0             | 0             | 0      | 1               |
| 106 | Kongsøya       | 25/04/2009 | Spring | den area      | 0            | 0                 | 0                   | 0                   | 0            | 0    | 0          | 0            | 0    | 0   | 0     | 1      | 1     | 1     | 1    | 0      | 1           | 0             | 1             | 1      | 1               |
| 107 | NA             | 26/04/2009 | Spring | den area      | 0            | 0                 | 0                   | 0                   | 0            | 0    | 0          | 0            | 0    | 0   | 0     | 1      | 0     | 0     | 1    | 0      | 1           | 0             | 0             | 0      | 1               |

| no                     | Area     | date       | Season | sex, age | Pusa hispida | Pusa hispida, pup | Pusa hispida, adult | Erignathus barbatus | Unknown seal | Seal | R.tarandus | Unknown.bone | Bird | Egg | Algae | Plants | Grass | Segde | Moss | Lichen | Dicotyledon | Monocotyeldon | Unknown plant | Gravel | Polar.bear.hair |
|------------------------|----------|------------|--------|----------|--------------|-------------------|---------------------|---------------------|--------------|------|------------|--------------|------|-----|-------|--------|-------|-------|------|--------|-------------|---------------|---------------|--------|-----------------|
| 108                    | Kongsøya | 25/04/2009 | Spring | den area | 0            | 0                 | 0                   | 0                   | 0            | 0    | 0          | 0            | 0    | 0   | 0     | 0      | 0     | 0     | 0    | 0      | 0           | 0             | 0             | 0      | 1               |
| 109                    | Kongsøya | 24/04/2009 | Spring | den area | 0            | 0                 | 0                   | 0                   | 0            | 0    | 0          | 0            | 0    | 0   | 0     | 0      | 0     | 0     | 0    | 0      | 0           | 0             | 0             | 0      | 1               |
| 110                    | NA       | 26/04/2009 | Spring | den area | 0            | 0                 | 0                   | 0                   | 0            | 0    | 0          | 0            | 0    | 0   | 0     | 0      | 0     | 0     | 0    | 0      | 0           | 0             | 0             | 0      | 1               |
| 111                    | Kongsøya | 24/04/2009 | Spring | den area | 0            | 0                 | 0                   | 0                   | 0            | 0    | 0          | 0            | 0    | 0   | 0     | 1      | 1     | 1     | 1    | 0      | 1           | 0             | 0             | 0      | 1               |
| 112                    | Kongsøya | 24/04/2009 | Spring | den area | 0            | 0                 | 0                   | 0                   | 0            | 0    | 0          | 0            | 0    | 0   | 0     | 0      | 0     | 0     | 0    | 0      | 0           | 0             | 0             | 0      | 1               |
| 113                    | Kongsøya | 25/04/2009 | Spring | den area | 0            | 0                 | 0                   | 0                   | 0            | 0    | 0          | 0            | 0    | 0   | 0     | 0      | 0     | 0     | 0    | 0      | 0           | 0             | 0             | 0      | 1               |
| 114                    | NA       | 01/04/2009 | Spring | den area | 0            | 0                 | 0                   | 0                   | 0            | 0    | 0          | 0            | 0    | 0   | 0     | 1      | 1     | 0     | 1    | 0      | 1           | 1             | 0             | 0      | 1               |
| 115                    | NA       | 26/04/2009 | Spring | den area | 1            | 0                 | 1                   | 0                   | 0            | 1    | 0          | 0            | 0    | 0   | 0     | 1      | 1     | 0     | 1    | 0      | 1           | 0             | 1             | 0      | 1               |
| 116                    | NA       | 26/04/2009 | Spring | den area | 1            | 0                 | 1                   | 0                   | 0            | 1    | 0          | 0            | 0    | 0   | 0     | 1      | 1     | 0     | 1    | 0      | 1           | 0             | 0             | 0      | 1               |
| 117                    | Kongsøya | 24/04/2009 | Spring | den area | 0            | 0                 | 0                   | 0                   | 0            | 0    | 0          | 0            | 1    | 0   | 0     | 1      | 1     | 0     | 1    | 0      | 1           | 0             | 1             | 0      | 1               |
| 118                    | NA       | 27/04/2009 | Spring | den area | 0            | 0                 | 0                   | 0                   | 0            | 0    | 0          | 0            | 0    | 0   | 0     | 1      | 1     | 0     | 1    | 0      | 1           | 0             | 0             | 0      | 0               |
| 119                    | NA       | April 2009 | Spring | den area | 0            | 0                 | 0                   | 0                   | 0            | 0    | 0          | 0            | 0    | 0   | 0     | 1      | 1     | 0     | 1    | 0      | 1           | 0             | 0             | 0      | 1               |
| <b>TOTAL OCCURENCE</b> |          |            |        |          | 74           | 59                | 14                  | 1                   | 24           | 85   | 11         | 3            | 19   | 3   | 26    | 39     | 31    | 11    | 32   | 7      | 29          | 2             | 16            | 10     | 29              |
